# Supplementary material for: Biofilm Formation and Anti-Inflammatory Response of a Probiotic Blend
Source: Preprints.org preprint supplement (doi:10.20944/preprints202409.0922.v1), 2024-09-12
Supplement: Supplementary file 1 [file supplementary]

**
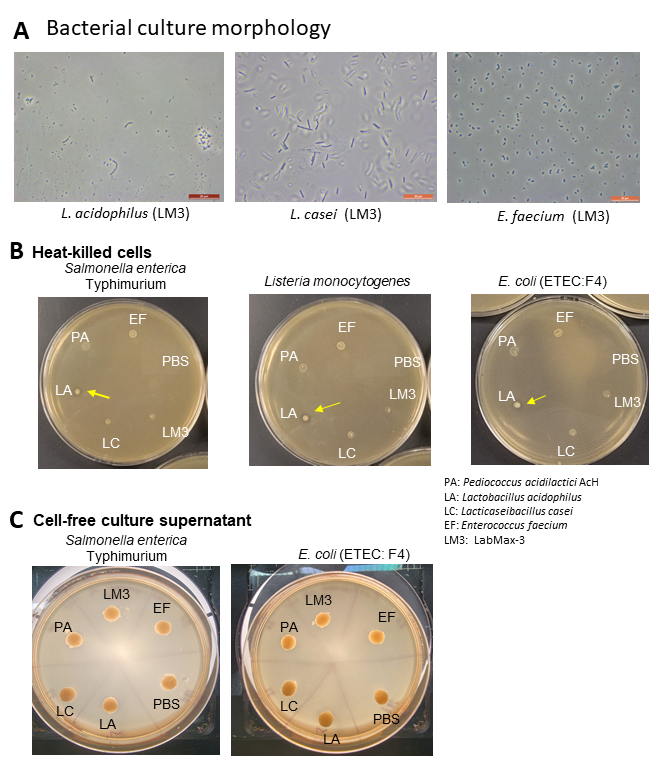
Supplementary figure**

**Figure S1.** Probiotic culture isolates morphology (A) and antimicrobial activity of heat-killed (B), and cell-free culture supernatants (C) against pathogens. In panel A, the morphology of probiotic culture isolates were examined under a phase contrast microscope. In Panel B, heat-killed cells (10 µl) were deposited on MRS agar plate, which was overlaid with test strains suspended in TSA soft agar (0.8%) preparation suspended in test pathogens. Zone of Inhibition was produced only by heat-killed LA cells. In Panel C, cell-free culture supernatants (40 µl) were deposited on blotting paper discs on a lawn of pathogens on BHI agar surface.
